# Supplementary material for: Magnetic observation of above room-temperature spin transition in vesicular nano-spheres
Source: Royal Society of Chemistry journal article supplement (doi:10.1039/c6tc02796b), 2016-01-01
Supplement: c6tc02796b1.pdf [file c6tc02796b1.pdf]

## Supporting Information

### Magnetic observation of above room-temperature spin transition in vesicular nano-sphere

Yang-Hui Luo,<sup>\*a</sup> Qing-Ling Liu,<sup>a</sup> Li-Jing Yang,<sup>a</sup> Yu Sun,<sup>a,b</sup> Jin-Wen Wang,<sup>a</sup> Chao-Qun

You<sup>a</sup> and Bai-Wang Sun,<sup>\*a</sup>

<sup>a</sup> School of Chemistry and Chemical Engineering, Southeast University, Nanjing, 211189, P. R. China. E-mail: [peluoyh@sina.com](mailto:peluoyh@sina.com) (Luo) [chmsunbw@seu.edu.cn](mailto:chmsunbw@seu.edu.cn) (Sun).

<sup>b</sup> School of Pharmacy, Wannan Medical College, Wuhu, 241002, PR. China.

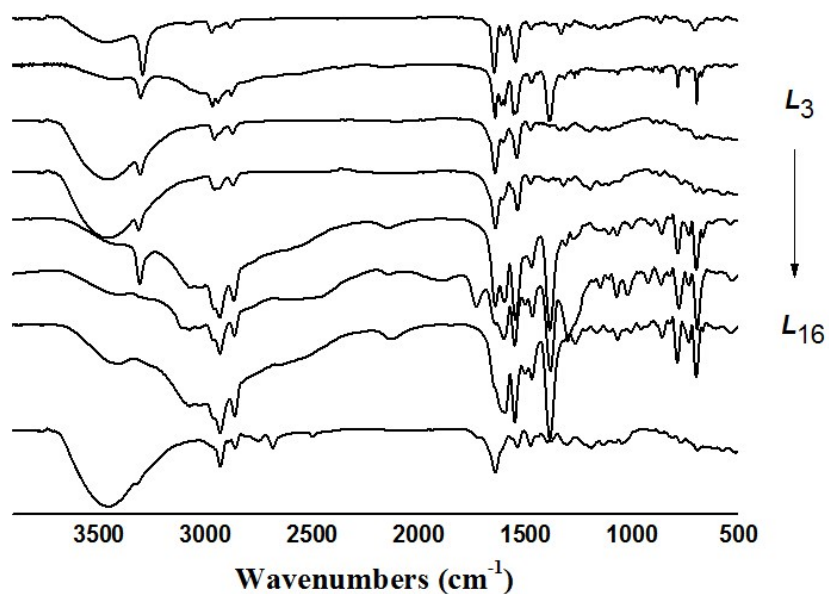

**Figure. S1** IR spectra of the alkylated bipy related ligands  $L_3$ - $L_9$  and  $L_{16}$ .

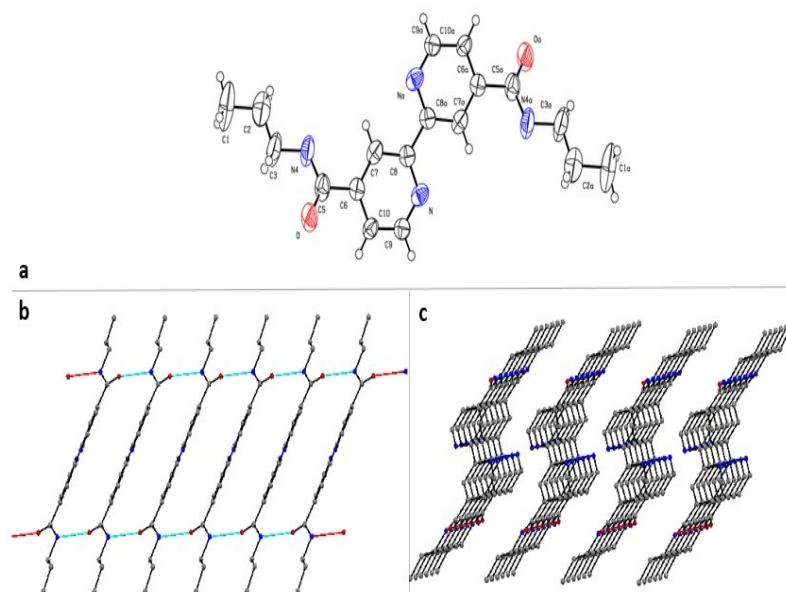

**Figure. S2** Crystal structure of ligand  $L_3$  with thermal ellipsoids drawn at the 30% probability level (a), the molecules are connected by N-H...O hydrogen bond contacts into 1D chain (b), and the 1D chains packed parallel into 3D motif.

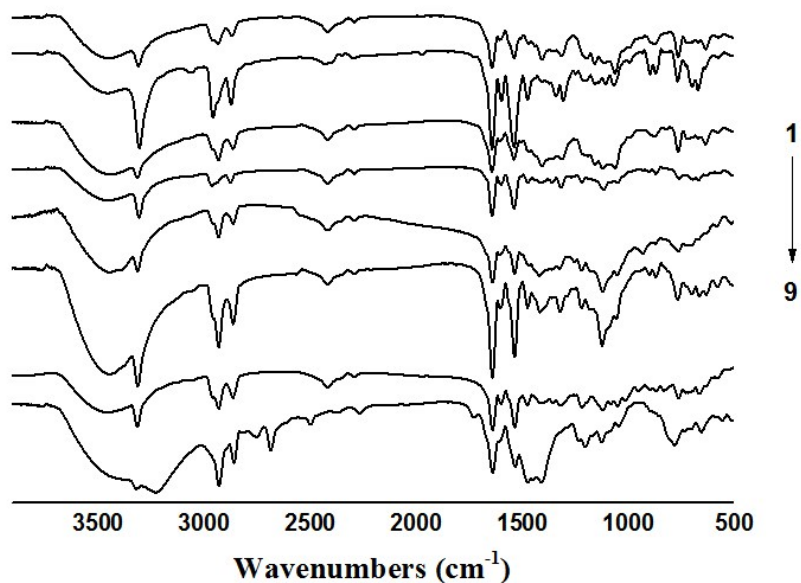

**Figure. S3** IR spectra of the coordination Fe (II) compounds **1-7** and **9**.

**Table S1.** The crystal data and structure refinement for ligands  $L_3$

| Compound                             | $L_3$                |
|--------------------------------------|----------------------|
| Formula                              | $C_{18}H_{22}N_4O_2$ |
| Formula weight                       | 326.40               |
| Crystal system                       | Triclinic            |
| Space group                          | $P-1$                |
| $a/\text{\AA}$                       | 5.016(1)             |
| $b/\text{\AA}$                       | 5.4660(11)           |
| $c/\text{\AA}$                       | 16.124(3)            |
| $\alpha/^\circ$                      | 93.12(3)             |
| $\beta/^\circ$                       | 96.16(3)             |
| $\gamma/^\circ$                      | 93.03(3)             |
| $V, \text{\AA}^3$                    | 438.11(15)           |
| $Z$                                  | 1                    |
| $D_{\text{calc}} (\text{Mg m}^{-3})$ | 1.237                |
| T/K                                  | 293(2)               |
| $\mu (\text{mm}^{-1})$               | 0.083                |
| Cryst dimensions                     | 0.3×0.2×0.1          |
| No. of reflns collected              | 1394                 |
| No. of unique reflns                 | 583                  |
| No. of params                        | 108                  |
| Goodness-of-fit on $F^2$             | 1.006                |
| $R_1, wR_2$ ( $ I  > 2\sigma(I)$ )   | 0.0546, 0.0903       |
| $R1, wR2$ (all data)                 | 0.1221, 0.1056       |
| CCDC No                              | 1437555              |

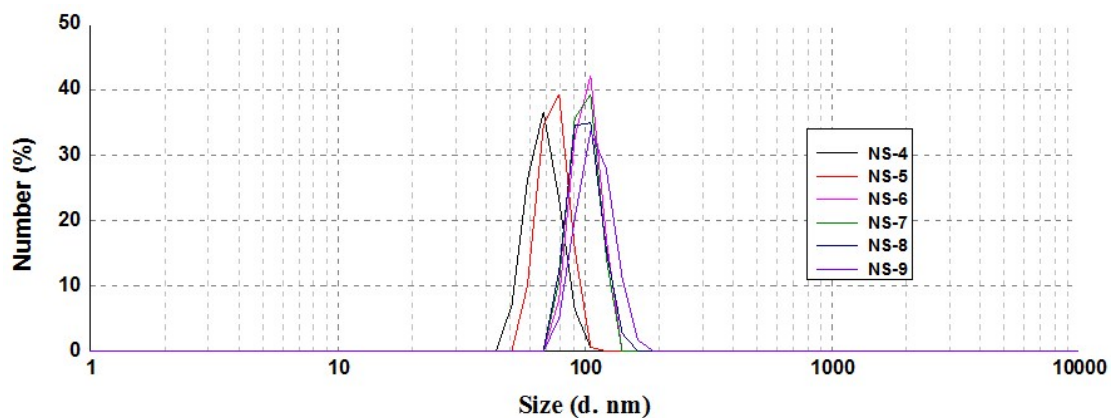

**Figure S4.** DLS measurements of vesicular nano-sphere **NS-4 – NS-9**.

**Table S2.** Size distribution of vesicular nano-sphere **NS-4 – NS-9** measured by DLS.

|        | NS-4  | NS-5  | NS-6  | NS-7  | NS-8  | NS-9  |
|--------|-------|-------|-------|-------|-------|-------|
| D (nm) | 72.2  | 80.5  | 98.7  | 99.2  | 100.2 | 101.5 |
| PDI    | 0.291 | 0.233 | 0.197 | 0.266 | 0.202 | 0.215 |

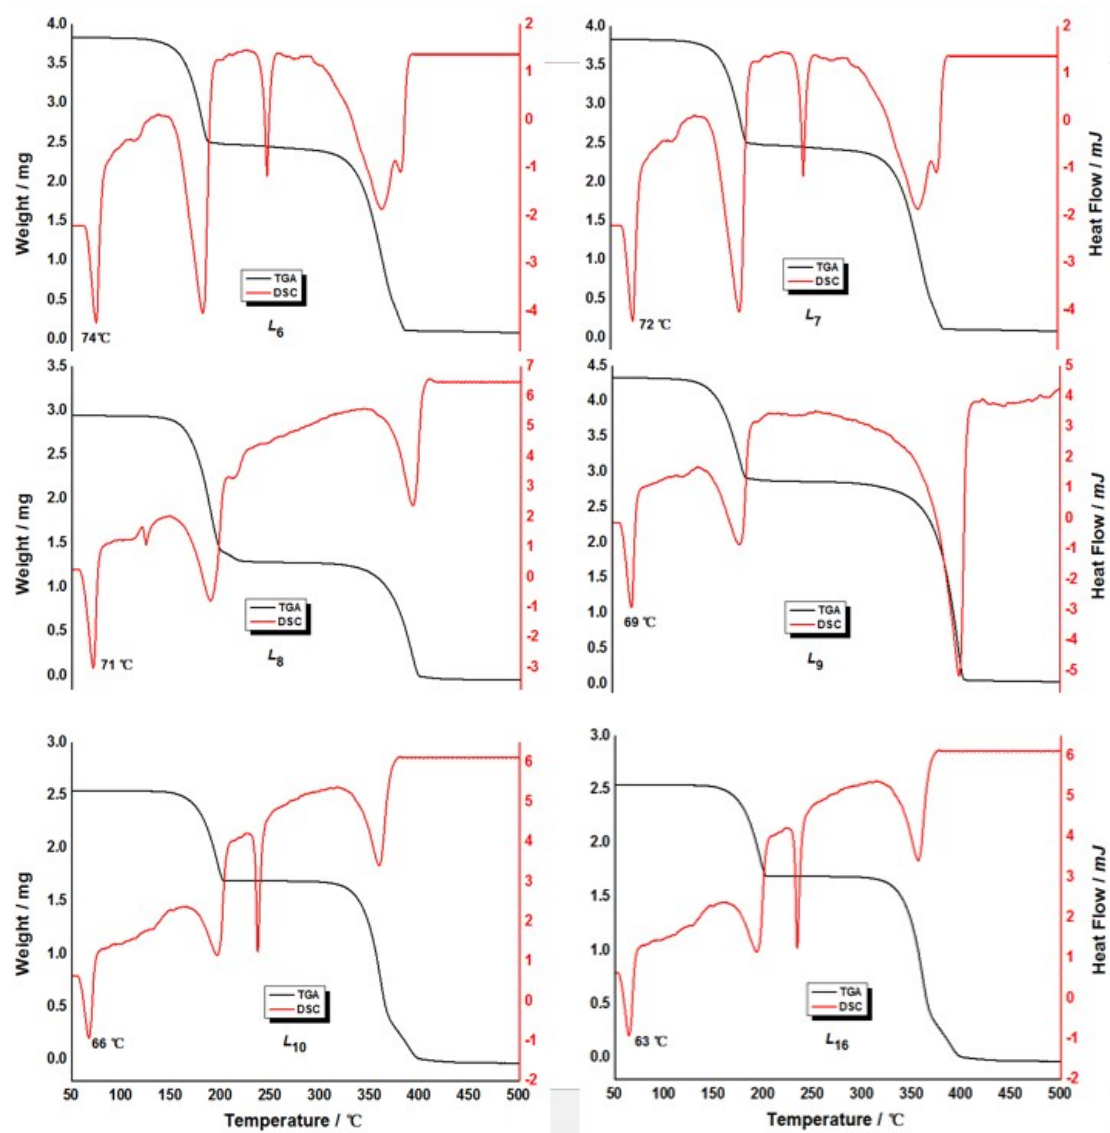

Figure S5. TGA and DSC profiles of ligands  $L_6$  -  $L_{16}$ .

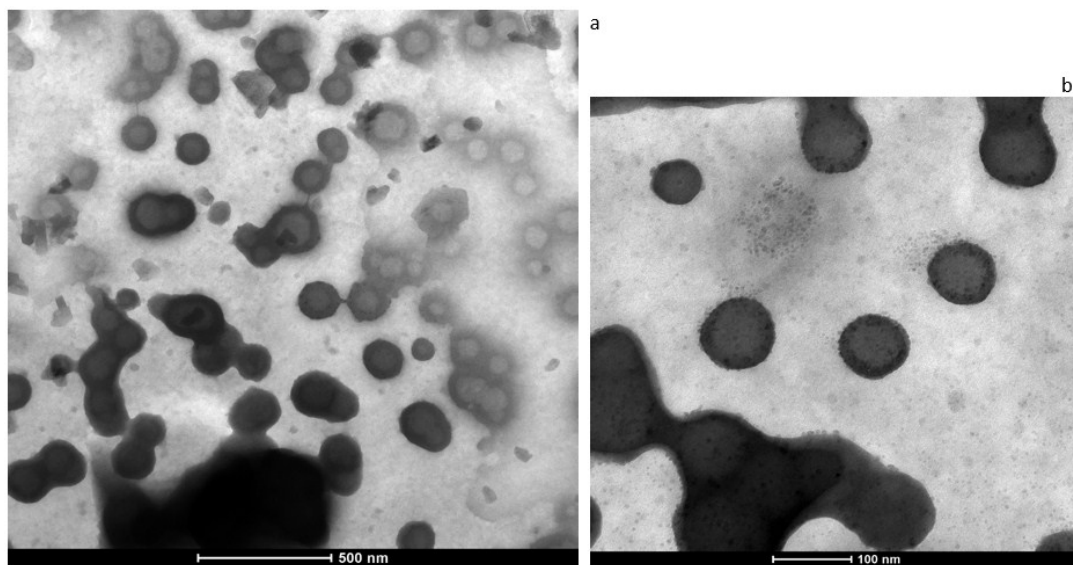

**Figure S6.** TEM images of the re-obtained species at 500 (a) and 100 nm (b) scale.
